# Supplementary material for: The Influence of Phenol on the Growth, Morphology and Cell Division of Euglena gracilis
Source: MDPI journal article supplement (doi:10.3390/life13081734), 2023-08-12
Supplement: s1 [file s1]

# The influence of phenol on the growth, morphology and cell division of *Euglena gracilis*

## SUPPLEMENTARY MATERIALS

**Citation:** Lukáčová, A.; Lihanová, D.; Beck, T.; Alberty, R.; Vešelényiová, D.; Krajčovič, J.; Vesteg, M. The Influence of Phenol on the Growth, Morphology and Cell Division of *Euglena gracilis*. *Life* **2023**, *13*, 1734. <https://doi.org/10.3390/life13081734>

Table S1. Two-way ANOVA: Tests of within-subjects and between-subjects effects for cell count, spherical shape cells, hypertrophied cells, monster cells, lipofuscin bodies and atypically dividing cells of *Euglena gracilis*.

| Outcomes                                                 | F      | df             | Sig.    | Cohen's d |
|----------------------------------------------------------|--------|----------------|---------|-----------|
| <i>Main effect – cultivation time × phenol treatment</i> |        |                |         |           |
| Cell count                                               | 4.146  | 12.328, 29.587 | <0.001  | 0.633     |
| Spherical shape cells                                    | 0.645  | 9.685, 23.245  | 0.757   | 0.212     |
| Hypertrophied cells                                      | 1.686  | 9.667, 23.200  | 0.146   | 0.413     |
| Monster cells                                            | 0.634  | 8.842, 21.222  | 0.754   | 0.209     |
| Lipofuscin bodies                                        | 0.889  | 7.612, 18.265  | 0.541   | 0.270     |
| Atypically dividing cells                                | 0.865  | 11.060, 26.544 | 0.583   | 0.265     |
| <i>Main effect – cultivation time</i>                    |        |                |         |           |
| Cell count                                               | 38.160 | 2.466, 29.587  | <0.001  | 0.761     |
| Spherical shape cells                                    | 7.064  | 1.937, 23.245  | 0.004   | 0.371     |
| Hypertrophied cells                                      | 4.072  | 1.933, 23.200  | 0.032   | 0.253     |
| Monster cells                                            | 1.322  | 1.768, 21.222  | 0.285   | 0.099     |
| Lipofuscin bodies                                        | 4.233  | 1.522, 18.265  | 0.040   | 0.260     |
| Atypically dividing cells                                | 3.855  | 2.212, 26.544  | 0.030   | 0.243     |
| <i>Main effect – phenol treatment</i>                    |        |                |         |           |
| Cell count                                               | 9.024  | 5, 12          | <0.001, | 0.790     |
| Spherical shape cells                                    | 15.748 | 5, 12          | <0.001, | 0.868     |
| Hypertrophied cells                                      | 4.829  | 5, 12          | 0.012   | 0.668     |
| Monster cells                                            | 6.167  | 5, 12          | 0.005   | 0.720     |
| Lipofuscin bodies                                        | 0.854  | 5, 12          | 0.538   | 0.262     |
| Atypically dividing cells                                | 5.591  | 5, 12          | 0.007   | 0.700     |

Data were checked for homogeneity of variation and sphericity. As our data violated the assumption of sphericity, a repeated measures ANOVA with a Greenhouse-Geisser correction was used.

F, Fisher F-test; df, degree of freedom.

Statistical significance at  $P < 0.05$  is highlighted by pink color.

Table S2. Two-way ANOVA: Test of pairwise differences (factor: phenol treatment) for cell count, spherical shape cells, hypertrophied cells, monster cells, lipofuscin bodies and atypically dividing cells of *Euglena gracilis*.

| Group (I)                        | Group (J) | Mean Dif.<br>(I-J) | Std. Error | Sig.   | 95% CI for Difference |             |
|----------------------------------|-----------|--------------------|------------|--------|-----------------------|-------------|
|                                  |           |                    |            |        | Lower Bound           | Upper Bound |
| Cell count × 10 <sup>5</sup> /ml |           |                    |            |        |                       |             |
| Control                          | 3.81 mM   | 2.159              | 2.152      | 1.000  | -5.694                | 10.012      |
|                                  | 4.23 mM   | 5.778              | 2.152      | 0.298  | -2.075                | 13.631      |
|                                  | 4.65 mM   | 9.194              | 2.152      | 0.016  | 1.341                 | 17.047      |
|                                  | 5.07 mM   | 8.173              | 2.152      | 0.038  | 0.320                 | 16.026      |
|                                  | 5.49 mM   | 12.259             | 2.152      | 0.001  | 4.406                 | 20.112      |
| Spherical shape cells, %         |           |                    |            |        |                       |             |
| Control                          | 3.81 mM   | -28.828            | 5.341      | 0.002  | -48.316               | -9.339      |
|                                  | 4.23 mM   | -30.611            | 5.341      | 0.001  | -50.100               | -11.123     |
|                                  | 4.65 mM   | -34.261            | 5.341      | <0.001 | -53.750               | -14.773     |
|                                  | 5.07 mM   | -37.044            | 5.341      | <0.001 | -56.533               | -17.556     |
|                                  | 5.49 mM   | -42.678            | 5.341      | <0.001 | -62.166               | -23.189     |
| Hypertrophied cells, %           |           |                    |            |        |                       |             |
| Control                          | 3.81 mM   | -1.317             | 3.149      | 1.000  | -12.808               | 10.174      |
|                                  | 4.23 mM   | -2.894             | 3.149      | 1.000  | -14.386               | 8.597       |
|                                  | 4.65 mM   | -3.539             | 3.149      | 1.000  | -15.030               | 7.952       |
|                                  | 5.07 mM   | -9.556             | 3.149      | 0.156  | -21.047               | 1.936       |
|                                  | 5.49 mM   | -12.339            | 3.149      | 0.031  | -23.830               | -0.848      |
| Monster cells, %                 |           |                    |            |        |                       |             |
| Control                          | 3.81 mM   | -0.100             | 0.482      | 0.839  | -1.151                | 0.951       |
|                                  | 4.23 mM   | -0.117             | 0.482      | 0.813  | -1.168                | 0.934       |
|                                  | 4.65 mM   | -0.661             | 0.482      | 0.196  | -1.712                | 0.390       |
|                                  | 5.07 mM   | -0.956             | 0.482      | 0.071  | -2.007                | 0.096       |
|                                  | 5.49 mM   | -2.228             | 0.482      | <0.001 | -3.279                | -1.177      |
| Lipofuscin bodies, %             |           |                    |            |        |                       |             |
| Control                          | 3.81 mM   | -1.700             | 0.971      | 1.000  | -5.244                | 1.844       |
|                                  | 4.23 mM   | -0.906             | 0.971      | 1.000  | -4.450                | 2.639       |
|                                  | 4.65 mM   | -1.128             | 0.971      | 1.000  | -4.672                | 2.417       |
|                                  | 5.07 mM   | -1.133             | 0.971      | 1.000  | -4.678                | 2.411       |
|                                  | 5.49 mM   | -0.211             | 0.971      | 1.000  | -3.756                | 3.333       |
| Atypically dividing cells, %     |           |                    |            |        |                       |             |
| Control                          | 3.81 mM   | -0.100             | 0.822      | 1.000  | -3.101                | 2.901       |
|                                  | 4.23 mM   | -0.511             | 0.822      | 1.000  | -3.512                | 2.490       |
|                                  | 4.65 mM   | -1.617             | 0.822      | 1.000  | -4.617                | 1.384       |
|                                  | 5.07 mM   | -2.339             | 0.822      | 0.222  | -5.340                | 0.662       |
|                                  | 5.49 mM   | -3.428             | 0.822      | 0.020  | -6.429                | -0.427      |

CI, confidence interval.

Based on estimated marginal means.

Statistical significance at P < 0.05 is highlighted by pink color.

Adjustment for multiple comparisons: Bonferroni.

Table S3. Two-way ANOVA: Test of pairwise differences (factor: time) for cell count, spherical shape cells, hypertrophied cells, monster cells, lipofuscin bodies and atypically dividing cells of *Euglena gracilis*.

| Time (I)                         | Time (J) | Mean Dif.<br>(I-J) | Std. Error | Sig.   | 95% CI for Difference |             |
|----------------------------------|----------|--------------------|------------|--------|-----------------------|-------------|
|                                  |          |                    |            |        | Lower Bound           | Upper Bound |
| Cell count × 10 <sup>5</sup> /ml |          |                    |            |        |                       |             |
| 1h                               | 24h      | -0.037             | 0.075      | 1.000  | -0.309                | 0.236       |
|                                  | 3d       | -0.812             | 0.284      | 0.217  | -1.849                | 0.225       |
|                                  | 7d       | -7.622             | 1.256      | <0.001 | -12.205               | -3.039      |
|                                  | 10d      | -12.406            | 1.609      | <0.001 | -18.277               | -6.535      |
|                                  | 14d      | -14.823            | 1.995      | <0.001 | -22.103               | -7.543      |
| Spherical shape cells, %         |          |                    |            |        |                       |             |
| 1h                               | 24h      | -19.794            | 12.399     | 1.000  | -65.037               | 25.448      |
|                                  | 3d       | -8.967             | 4.093      | 0.734  | -23.903               | 5.969       |
|                                  | 7d       | 19.222             | 5.392      | 0.058  | -0.454                | 38.898      |
|                                  | 10d      | 18.822             | 6.008      | 0.130  | -3.099                | 40.743      |
|                                  | 14d      | 2.128              | 9.145      | 1.000  | -31.242               | 35.497      |
| Hypertrophied cells, %           |          |                    |            |        |                       |             |
| 1h                               | 24h      | -2.439             | 0.598      | 0.023  | -4.621                | -0.257      |
|                                  | 3d       | -6.011             | 2.650      | 0.638  | -15.680               | 3.658       |
|                                  | 7d       | -0.967             | 0.448      | 0.782  | -2.603                | 0.670       |
|                                  | 10d      | -7.811             | 1.475      | 0.003  | -13.194               | -2.428      |
|                                  | 14d      | -10.517            | 4.165      | 0.400  | -25.715               | 4.681       |
| Monster cells, %                 |          |                    |            |        |                       |             |
| 1h                               | 24h      | 0.000              | 0.000      | .      | 0.000                 | 0.000       |
|                                  | 3d       | -0.722             | 0.348      | 0.060  | -1.481                | 0.037       |
|                                  | 7d       | -1.233             | 0.540      | 0.041  | -2.410                | -0.056      |
|                                  | 10d      | -0.817             | 0.464      | 0.104  | -1.827                | 0.194       |
|                                  | 14d      | -1.289             | 0.846      | 0.153  | -3.131                | 0.554       |
| Lipofuscin bodies, %             |          |                    |            |        |                       |             |
| 1h                               | 24h      | -0.928             | 0.571      | 1.000  | -3.013                | 1,157       |
|                                  | 3d       | 0.000              | 0.000      | .      | 0.000                 | 0.000       |
|                                  | 7d       | 0.000              | 0.000      | .      | 0.000                 | 0.000       |
|                                  | 10d      | -1.033             | 0.577      | 1.000  | -3.139                | 1.072       |
|                                  | 14d      | -3.117             | 1.246      | 0.417  | -7.662                | 1.428       |
| Atypically dividing cells, %     |          |                    |            |        |                       |             |
| 1h                               | 24h      | 0.000              | 0.000      | .      | 0.000                 | 0.000       |
|                                  | 3d       | -0.650             | 0.306      | 0.827  | -1.767                | 0.467       |
|                                  | 7d       | -2.861             | 0.624      | 0.009  | -5.136                | -0.586      |
|                                  | 10d      | -3.083             | 1.256      | 0.455  | -7.668                | 1.501       |
|                                  | 14d      | -1.400             | 0.850      | 1.000  | -4.501                | 1.701       |

CI, confidence interval; h, hour; d, day(s).

Based on estimated marginal means.

Statistical significance at P < 0.05 is highlighted by pink color.

Adjustment for multiple comparisons: Bonferroni.
